# Supplementary material
Source: PubMed Central journal article supplement (PMC4006431)
Supplement: peds.2013-2350_peds.2013-2350SupplementaryData.pdf [file peds.2013-2350_peds.2013-2350SupplementaryData.pdf]

## Supplemental Information

**SUPPLEMENTAL TABLE 4** Composite Knowledge/Attitude Score<sup>54</sup>

| Question                                                                                                                                                   | Points    |
|------------------------------------------------------------------------------------------------------------------------------------------------------------|-----------|
| In your opinion:                                                                                                                                           |           |
| Can you help your child who is sick with a cold without medicine?                                                                                          | 1         |
| Do most colds and flu get better by themselves without medicines?                                                                                          | 1         |
| In your opinion, how often are antibiotics needed to treat each of the following illnesses? <sup>a</sup>                                                   |           |
| Colds                                                                                                                                                      | 1         |
| Runny nose                                                                                                                                                 | 1         |
| Flu                                                                                                                                                        | 1         |
| Viral throat infections                                                                                                                                    | 1         |
| Mild fever (<100° F)                                                                                                                                       | 1         |
| If I think my child needs an antibiotic, I would go to... <sup>b</sup>                                                                                     | 1         |
| When a prescription that your child's doctor gives you says to give the medicine orally, what does that mean?                                              | 1         |
| The doctor has given you a prescription for an antibiotic for your 5-mo-old child. Based on the child's age, what is the best way to measure the medicine? | 1         |
| <b>Total score</b>                                                                                                                                         | <b>10</b> |

<sup>a</sup> One point was given if responded rarely or never versus sometimes or usually.

<sup>b</sup> One point was given if respondent did NOT list any site other than a health care provider.

**SUPPLEMENTAL TABLE 5** Characteristics of Families By Site

|                                                 | Program A Site 1 (n = 57) | Program A Site 2 (n = 58) | Program B Site 3 (n = 19) | Program B Site 4 (n = 20) |
|-------------------------------------------------|---------------------------|---------------------------|---------------------------|---------------------------|
| Parent Participants                             |                           |                           |                           |                           |
| Age, y                                          |                           |                           |                           |                           |
| 19 to 29                                        | 52.6 (30)                 | 50.0 (29)                 | 47.4 (9)                  | 65.0 (13)                 |
| ≥30                                             | 47.4 (27)                 | 50.0 (29)                 | 52.6 (10)                 | 35.0 (7)                  |
| Race/ethnicity                                  |                           |                           |                           |                           |
| Latino                                          | 98.2 (55)                 | 87.5 (49)                 | 100 (19)                  | 90.0 (18)                 |
| Black, non-Latino                               | 0 (0)                     | 5.4 (3)                   | 0 (0)                     | 0 (0)                     |
| White, non-Latino                               | 0 (0)                     | 3.6 (2)                   | 0 (0)                     | 5.0 (1)                   |
| Other, non-Latino                               | 1.8 (1)                   | 3.6 (2)                   | 0 (0)                     | 5.0 (1)                   |
| Born in the United States: no                   | 91.2 (52)                 | 89.7 (52)                 | 94.7 (18)                 | 80.0 (16)                 |
| Primary language                                |                           |                           |                           |                           |
| Spanish                                         | 93.0 (53)                 | 81.0 (47)                 | 94.7 (18)                 | 80.0 (16)                 |
| English                                         | 5.3 (3)                   | 17.2 (10)                 | 5.3 (1)                   | 20.0 (4)                  |
| Other                                           | 1.8 (1)                   | 1.7 (1)                   | 0 (0)                     | 0 (0)                     |
| English proficiency                             |                           |                           |                           |                           |
| Excellent–good                                  | 22.8 (13)                 | 25.9 (15)                 | 15.8 (3)                  | 45.0 (9)                  |
| Fair                                            | 22.8 (13)                 | 13.8 (8)                  | 36.8 (7)                  | 15.0 (3)                  |
| Poor–not at all                                 | 54.4 (31)                 | 60.3 (35)                 | 47.4 (9)                  | 40.0 (8)                  |
| Education                                       |                           |                           |                           |                           |
| <High school                                    | 45.6 (26)                 | 51.7 (30)                 | 57.9 (11)                 | 25.0 (5)                  |
| High school                                     | 24.6 (14)                 | 25.9 (15)                 | 15.8 (3)                  | 30.0 (6)                  |
| Some college                                    | 29.8 (17)                 | 22.4 (13)                 | 26.3 (5)                  | 45.0 (9)                  |
| Health literacy                                 |                           |                           |                           |                           |
| STOFHLA                                         |                           |                           |                           |                           |
| Adequate                                        | 69.1 (38)                 | 63.0 (34)                 | 77.8 (14)                 | 70.0 (14)                 |
| Marginal                                        | 12.7 (7)                  | 20.4 (11)                 | 5.6 (1)                   | 15.0 (3)                  |
| Inadequate                                      | 18.2 (10)                 | 16.7 (9)                  | 16.7 (3)                  | 15.0 (3)                  |
| NVS                                             |                           |                           |                           |                           |
| Adequate                                        | 14.5 (8)                  | 13.0 (7)                  | 27.8 (5)                  | 25.0 (5)                  |
| Possible limited                                | 58.2 (32)                 | 38.9 (21)                 | 16.7 (3)                  | 35.0 (7)                  |
| High likelihood limited                         | 27.3 (15)                 | 48.1 (26)                 | 55.6 (10)                 | 40.0 (8)                  |
| Pediatric Participants Younger Than Age 4 Years |                           |                           |                           |                           |
|                                                 | Program A Site 1 (n = 75) | Program A Site 2 (n = 73) | Program B Site 3 (n = 24) | Program B Site 4 (n = 25) |
| Age, mo                                         | 21.1 ± 12.3               | 21.8 ± 10.4               | 19.8 ± 12.0               | 25.4 ± 11.8               |
| Gender: male                                    | 42.7 (32)                 | 46.6 (34)                 | 54.2 (13)                 | 44.0 (11)                 |
| Race/ethnicity                                  |                           |                           |                           |                           |
| Latino                                          | 91.7 (66)                 | 85.7 (60)                 | 100.0 (24)                | 72.0 (18)                 |
| Black, non-Latino                               | 0 (0)                     | 4.3 (3)                   | 0 (0)                     | 4.0 (1)                   |
| White, non-Latino                               | 1.4 (1)                   | 5.7 (4)                   | 0 (0)                     | 4.0 (1)                   |
| Other, non-Latino                               | 6.9 (5)                   | 4.3 (3)                   | 0 (0)                     | 20.0 (5)                  |
| Born in the United States: no                   | 4.0 (3)                   | 1.4 (1)                   | 0 (0)                     | 0 (0)                     |
| Insurance                                       |                           |                           |                           |                           |
| Private                                         | 10.7 (8)                  | 2.7 (2)                   | 8.3 (2)                   | 12.0 (3)                  |
| Public                                          | 89.3 (67)                 | 97.3 (71)                 | 91.7 (22)                 | 88.0 (22)                 |

All data are presented as % (n). All P value comparisons between matched sites within a program were non-significant with the exception of race/ethnicity for children younger than age 4 years where P = .04.
